# Supplementary material
Source: Springer Nature journal article supplement (https://www.springermedizin.de/resource/supplementary/12943_2011_1063_MOESM1_ESM.pdf/9552188)
Supplement: MOESM1 [file 9552188]

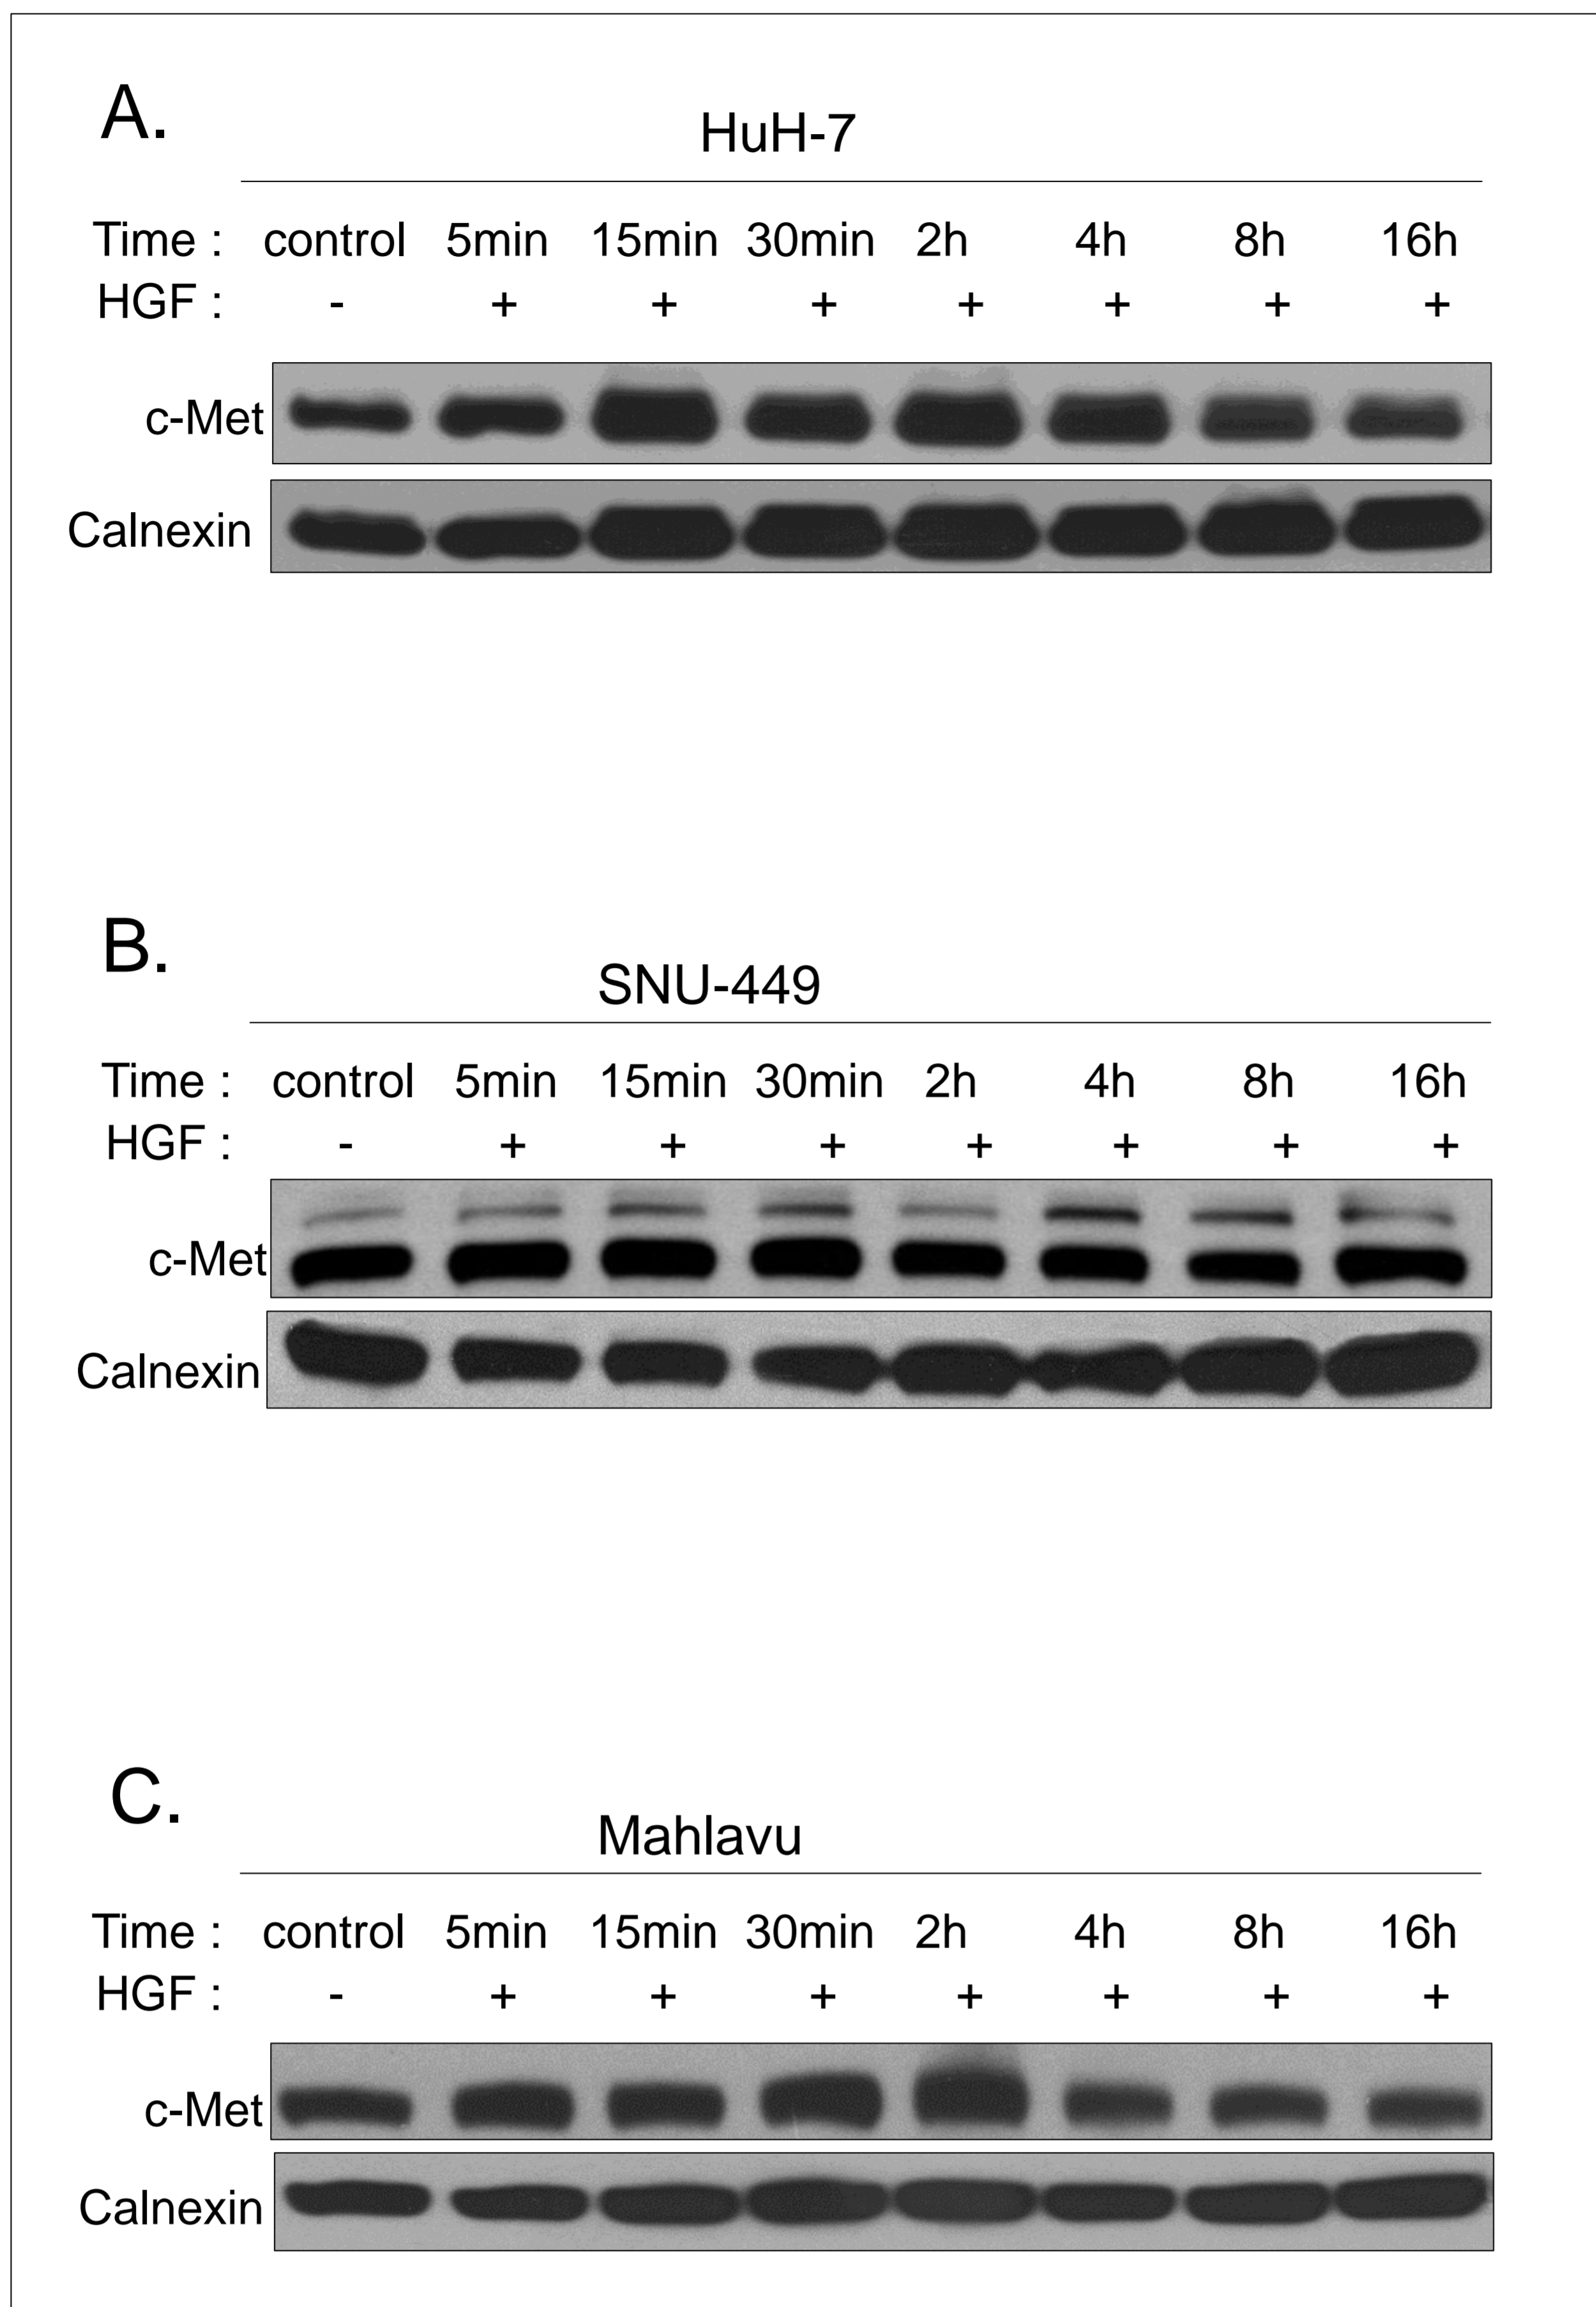

Supplementary Figure 1
